# Supplementary material for: Genetic and Genomic Characterization of a New Beef Cattle Composite Breed (Purunã) Developed for Production in Pasture-Based Systems
Source: Front Genet. 2022 Jul 18;13:858970. doi: 10.3389/fgene.2022.858970 (PMC9341487; doi:10.3389/fgene.2022.858970)
Supplement: Supplementary file 1 [file Table2.XLSX]

## Sheet: Sheet1
	CHR	BP1	BP2	chr	start_pos	end_pos	width	strand	gene_id	gene_name	gene_biotype
1	1	26505838	29555484	1	28280840	28284623	3784	-	ENSBTAG00000051036	#N/A	protein_coding
2	1	26505838	29555484	1	29058030	29062155	4126	+	ENSBTAG00000008359	#N/A	protein_coding
3	1	26505838	29555484	1	29107326	29419066	311741	-	ENSBTAG00000036262	GBE1	protein_coding
4	2	42384465	43575039	2	42650738	42652184	1447	+	ENSBTAG00000021526	RPRM	protein_coding
5	2	42384465	43575039	2	43268213	43269180	968	-	ENSBTAG00000012816	#N/A	pseudogene
6	2	42384465	43575039	2	43416111	43416743	633	+	ENSBTAG00000033143	#N/A	protein_coding
7	2	42384465	43575039	2	43427948	43469180	41233	-	ENSBTAG00000001435	ARL6IP6	protein_coding
8	2	42384465	43575039	2	43458207	43462208	4002	-	ENSBTAG00000047365	#N/A	protein_coding
9	2	42384465	43575039	2	43463000	43463103	104	+	ENSBTAG00000050475	U6	snRNA
10	2	42384465	43575039	2	43470324	43528516	58193	+	ENSBTAG00000048151	PRPF40A	protein_coding
11	2	42384465	43575039	2	43534082	43866708	332627	-	ENSBTAG00000026851	FMNL2	protein_coding
12	3	8435805	9838978	3	8436890	8442549	5660	+	ENSBTAG00000017873	USF1	protein_coding
13	3	8435805	9838978	3	8442910	8444112	1203	+	ENSBTAG00000017856	TSTD1	protein_coding
14	3	8435805	9838978	3	8464412	8488977	24566	+	ENSBTAG00000017846	F11R	protein_coding
15	3	8435805	9838978	3	8564174	8574622	10449	+	ENSBTAG00000050256	#N/A	protein_coding
16	3	8435805	9838978	3	8591925	8602122	10198	+	ENSBTAG00000048662	ITLN2	protein_coding
17	3	8435805	9838978	3	8628057	8634971	6915	+	ENSBTAG00000052308	ITLN2	protein_coding
18	3	8435805	9838978	3	8669812	8678684	8873	+	ENSBTAG00000054271	#N/A	protein_coding
19	3	8435805	9838978	3	8694108	8697521	3414	+	ENSBTAG00000046231	#N/A	protein_coding
20	3	8435805	9838978	3	8695315	8755426	60112	+	ENSBTAG00000002951	CD244	protein_coding
21	3	8435805	9838978	3	8760842	8788290	27449	-	ENSBTAG00000002947	LY9	protein_coding
22	3	8435805	9838978	3	8802581	8816310	13730	+	ENSBTAG00000010458	#N/A	protein_coding
23	3	8435805	9838978	3	8811960	8812023	64	+	ENSBTAG00000048768	bta-mir-11983	miRNA
24	3	8435805	9838978	3	8848948	8864962	16015	-	ENSBTAG00000001197	SLAMF7	protein_coding
25	3	8435805	9838978	3	8901877	8932543	30667	+	ENSBTAG00000011238	CD48	protein_coding
26	3	8435805	9838978	3	8968782	8968876	95	-	ENSBTAG00000043605	U6	snRNA
27	3	8435805	9838978	3	8969591	9008636	39046	+	ENSBTAG00000007927	SLAMF1	protein_coding
28	3	8435805	9838978	3	9001592	9002599	1008	-	ENSBTAG00000051438	#N/A	protein_coding
29	3	8435805	9838978	3	9076733	9119524	42792	+	ENSBTAG00000019033	CD84	protein_coding
30	3	8435805	9838978	3	9152844	9174085	21242	+	ENSBTAG00000014368	SLAMF6	protein_coding
31	3	8435805	9838978	3	9251873	9253856	1984	+	ENSBTAG00000015741	#N/A	protein_coding
32	3	8435805	9838978	3	9265691	9294212	28522	-	ENSBTAG00000006560	VANGL2	protein_coding
33	3	8435805	9838978	3	9324285	9350657	26373	-	ENSBTAG00000004334	NCSTN	protein_coding
34	3	8435805	9838978	3	9350633	9394688	44056	+	ENSBTAG00000004333	COPA	protein_coding
35	3	8435805	9838978	3	9399899	9405346	5448	+	ENSBTAG00000007537	PEX19	protein_coding
36	3	8435805	9838978	3	9420056	9462754	42699	+	ENSBTAG00000005796	DCAF8	protein_coding
37	3	8435805	9838978	3	9460717	9471684	10968	-	ENSBTAG00000005793	PEA15	protein_coding
38	3	8435805	9838978	3	9471796	9473187	1392	+	ENSBTAG00000052819	#N/A	lncRNA
39	3	8435805	9838978	3	9474927	9484746	9820	-	ENSBTAG00000020223	CASQ1	protein_coding
40	3	8435805	9838978	3	9488276	9520439	32164	-	ENSBTAG00000038523	ATP1A4	protein_coding
41	3	8435805	9838978	3	9508647	9508743	97	-	ENSBTAG00000044911	U6	snRNA
42	3	8435805	9838978	3	9528257	9552859	24603	-	ENSBTAG00000010551	ATP1A2	protein_coding
43	3	8435805	9838978	3	9577152	9584516	7365	+	ENSBTAG00000009982	IGSF8	protein_coding
44	3	8435805	9838978	3	9585689	9610110	24422	-	ENSBTAG00000024507	KCNJ9	protein_coding
45	3	8435805	9838978	3	9603030	9638172	35143	+	ENSBTAG00000002414	KCNJ10	protein_coding
46	3	8435805	9838978	3	9615583	9615858	276	-	ENSBTAG00000052815	#N/A	protein_coding
47	3	8435805	9838978	3	9644360	9647791	3432	+	ENSBTAG00000002419	PIGM	protein_coding
48	3	8435805	9838978	3	9730538	9733707	3170	+	ENSBTAG00000007241	SLAMF9	protein_coding
49	3	8435805	9838978	3	9739774	9759677	19904	+	ENSBTAG00000001481	IGSF9	protein_coding
50	3	8435805	9838978	3	9761198	9769010	7813	+	ENSBTAG00000002068	TAGLN2	protein_coding
51	3	8435805	9838978	3	9764117	9764189	73	+	ENSBTAG00000044526	bta-mir-1584	miRNA
52	3	8435805	9838978	3	9783460	9813631	30172	+	ENSBTAG00000018487	CFAP45	protein_coding
53	3	8435805	9838978	3	9825348	9833376	8029	+	ENSBTAG00000010670	VSIG8	protein_coding
54	3	8435805	9838978	3	9834671	9834832	162	+	ENSBTAG00000028229	U1	snRNA
55	5	70752944	72012890	5	70577672	70908786	331115	+	ENSBTAG00000027064	BTBD11	protein_coding
56	5	70752944	72012890	5	70902522	70902628	107	-	ENSBTAG00000054110	U6	snRNA
57	5	70752944	72012890	5	70931732	70950944	19213	+	ENSBTAG00000004654	PWP1	protein_coding
58	5	70752944	72012890	5	70974100	70998583	24484	-	ENSBTAG00000012999	PRDM4	protein_coding
59	5	70752944	72012890	5	71006144	71006650	507	+	ENSBTAG00000046402	ASCL4	protein_coding
60	5	70752944	72012890	5	71017594	71038972	21379	-	ENSBTAG00000011070	RTCB	protein_coding
61	5	70752944	72012890	5	71042373	71086800	44428	-	ENSBTAG00000011071	BPIFC	protein_coding
62	5	70752944	72012890	5	71099853	71120096	20244	+	ENSBTAG00000020634	FBXO7	protein_coding
63	5	70752944	72012890	5	71116001	71201217	85217	-	ENSBTAG00000020636	SYN3	protein_coding
64	5	70752944	72012890	5	71250461	71259543	9083	+	ENSBTAG00000049009	#N/A	lncRNA
65	5	70752944	72012890	5	71388890	71459269	70380	+	ENSBTAG00000020638	TIMP3	protein_coding
66	5	70752944	72012890	5	71461978	71612550	150573	-	ENSBTAG00000050644	#N/A	protein_coding
67	5	70752944	72012890	5	71698793	71702575	3783	+	ENSBTAG00000030683	#N/A	protein_coding
68	5	70752944	72012890	5	71706750	71712324	5575	+	ENSBTAG00000018556	MGC137211	protein_coding
69	5	70752944	72012890	5	71726971	71732441	5471	-	ENSBTAG00000026666	MGC137014	protein_coding
70	5	70752944	72012890	5	71806170	72364695	558526	-	ENSBTAG00000021953	LARGE1	protein_coding
71	5	75043240	75983135	5	74969135	75090284	121150	-	ENSBTAG00000010865	CACNG2	protein_coding
72	5	75043240	75983135	5	75135020	75158505	23486	-	ENSBTAG00000026657	IFT27	protein_coding
73	5	75043240	75983135	5	75145365	75145619	255	+	ENSBTAG00000008137	#N/A	protein_coding
74	5	75043240	75983135	5	75159264	75168690	9427	+	ENSBTAG00000048453	#N/A	lncRNA
75	5	75043240	75983135	5	75176504	75193657	17154	-	ENSBTAG00000019159	PVALB	protein_coding
76	5	75043240	75983135	5	75265852	75284401	18550	+	ENSBTAG00000007531	NCF4	protein_coding
77	5	75043240	75983135	5	75349088	75370432	21345	+	ENSBTAG00000009064	CSF2RB	protein_coding
78	5	75043240	75983135	5	75406598	75407029	432	-	ENSBTAG00000032114	#N/A	processed_pseudogene
79	5	75043240	75983135	5	75415497	75433378	17882	-	ENSBTAG00000030652	TEX33	protein_coding
80	5	75043240	75983135	5	75435115	75442678	7564	-	ENSBTAG00000030650	TST	protein_coding
81	5	75043240	75983135	5	75441888	75452001	10114	+	ENSBTAG00000030648	MPST	protein_coding
82	5	75043240	75983135	5	75479863	75490596	10734	+	ENSBTAG00000030646	KCTD17	protein_coding
83	5	75043240	75983135	5	75494237	75529894	35658	-	ENSBTAG00000032152	TMPRSS6	protein_coding
84	5	75043240	75983135	5	75550213	75591439	41227	-	ENSBTAG00000016345	IL2RB	protein_coding
85	5	75043240	75983135	5	75616456	75629565	13110	-	ENSBTAG00000008074	C1QTNF6	protein_coding
86	5	75043240	75983135	5	75635774	75637042	1269	-	ENSBTAG00000008910	SSTR3	protein_coding
87	5	75043240	75983135	5	75656456	75673313	16858	-	ENSBTAG00000011043	RAC2	protein_coding
88	5	75043240	75983135	5	75672810	75672872	63	-	ENSBTAG00000045421	bta-mir-1835	miRNA
89	5	75043240	75983135	5	75703658	75734563	30906	+	ENSBTAG00000014237	CYTH4	protein_coding
90	5	75043240	75983135	5	75796037	75798511	2475	-	ENSBTAG00000007259	ELFN2	protein_coding
91	5	75043240	75983135	5	75836154	75847802	11649	-	ENSBTAG00000054739	#N/A	lncRNA
92	5	75043240	75983135	5	75887878	75903492	15615	-	ENSBTAG00000015043	MFNG	protein_coding
93	5	75043240	75983135	5	75907210	75940103	32894	-	ENSBTAG00000015044	CARD10	protein_coding
94	5	75043240	75983135	5	75946067	75946175	109	+	ENSBTAG00000042271	U6	snRNA
95	5	75043240	75983135	5	75967297	75967403	107	-	ENSBTAG00000043029	U6	snRNA
96	6	27154761	28275511	6	27929404	27930371	968	-	ENSBTAG00000015464	#N/A	protein_coding
97	7	8562310	10432630	7	8640062	8641153	1092	+	ENSBTAG00000054935	#N/A	protein_coding
98	7	8562310	10432630	7	8650291	8651474	1184	+	ENSBTAG00000049626	#N/A	protein_coding
99	7	8562310	10432630	7	8704338	8705300	963	-	ENSBTAG00000048716	#N/A	pseudogene
100	7	8562310	10432630	7	8740628	8740975	348	-	ENSBTAG00000052806	#N/A	processed_pseudogene
101	7	8562310	10432630	7	8782606	8783574	969	+	ENSBTAG00000049396	#N/A	protein_coding
102	7	8562310	10432630	7	8838174	8838280	107	-	ENSBTAG00000050358	U6	snRNA
103	7	8562310	10432630	7	8878230	8879414	1185	-	ENSBTAG00000051733	#N/A	protein_coding
104	7	8562310	10432630	7	8888829	8889914	1086	-	ENSBTAG00000052634	#N/A	protein_coding
105	7	8562310	10432630	7	8905847	8906878	1032	-	ENSBTAG00000054443	#N/A	protein_coding
106	7	8562310	10432630	7	8945626	8946597	972	-	ENSBTAG00000050472	#N/A	protein_coding
107	7	8562310	10432630	7	8949722	8950358	637	+	ENSBTAG00000054380	#N/A	protein_coding
108	7	8562310	10432630	7	8970038	8970985	948	-	ENSBTAG00000049157	#N/A	protein_coding
109	7	8562310	10432630	7	9044558	9045553	996	+	ENSBTAG00000051984	#N/A	protein_coding
110	7	8562310	10432630	7	9076252	9077217	966	+	ENSBTAG00000053236	#N/A	protein_coding
111	7	8562310	10432630	7	9126371	9127303	933	+	ENSBTAG00000054146	#N/A	protein_coding
112	7	8562310	10432630	7	9224014	9224952	939	+	ENSBTAG00000049017	#N/A	protein_coding
113	7	8562310	10432630	7	9283539	9329484	45946	-	ENSBTAG00000052522	#N/A	protein_coding
114	7	8562310	10432630	7	9440267	9441226	960	-	ENSBTAG00000055049	#N/A	protein_coding
115	7	8562310	10432630	7	9452761	9454650	1890	-	ENSBTAG00000055243	#N/A	protein_coding
116	7	8562310	10432630	7	9461761	9462729	969	-	ENSBTAG00000050759	#N/A	protein_coding
117	7	8562310	10432630	7	9490925	9491923	999	-	ENSBTAG00000048785	#N/A	protein_coding
118	7	8562310	10432630	7	9613339	9614292	954	+	ENSBTAG00000052651	#N/A	protein_coding
119	7	8562310	10432630	7	9634243	9635277	1035	+	ENSBTAG00000052812	#N/A	protein_coding
120	7	8562310	10432630	7	9656778	9657734	957	+	ENSBTAG00000051170	#N/A	protein_coding
121	7	8562310	10432630	7	9688347	9689714	1368	+	ENSBTAG00000054398	#N/A	protein_coding
122	7	8562310	10432630	7	9792240	9793489	1250	+	ENSBTAG00000047589	#N/A	protein_coding
123	7	8562310	10432630	7	9813346	9814314	969	-	ENSBTAG00000055277	#N/A	protein_coding
124	7	8562310	10432630	7	10022869	10023816	948	+	ENSBTAG00000053152	#N/A	protein_coding
125	7	8562310	10432630	7	10090682	10091650	969	+	ENSBTAG00000050774	#N/A	protein_coding
126	7	8562310	10432630	7	10165175	10166128	954	-	ENSBTAG00000053498	#N/A	protein_coding
127	7	8562310	10432630	7	10187630	10189078	1449	-	ENSBTAG00000054723	#N/A	protein_coding
128	7	8562310	10432630	7	10208213	10209202	990	-	ENSBTAG00000052468	#N/A	protein_coding
129	7	8562310	10432630	7	10235028	10235383	356	-	ENSBTAG00000052986	#N/A	protein_coding
130	7	8562310	10432630	7	10280901	10281959	1059	-	ENSBTAG00000049972	#N/A	protein_coding
131	7	8562310	10432630	7	10296528	10297538	1011	-	ENSBTAG00000050300	#N/A	protein_coding
132	7	8562310	10432630	7	10416394	10417392	999	+	ENSBTAG00000052896	#N/A	protein_coding
133	7	8562310	10432630	7	10428807	10442492	13686	+	ENSBTAG00000055231	#N/A	protein_coding
134	10	44820482	46032038	10	44831891	44846457	14567	+	ENSBTAG00000021944	RTRAF	protein_coding
135	10	44820482	46032038	10	44846568	44939145	92578	-	ENSBTAG00000021945	NID2	protein_coding
136	10	44820482	46032038	10	45121371	45125230	3860	-	ENSBTAG00000001423	#N/A	protein_coding
137	10	44820482	46032038	10	45157991	45165480	7490	+	ENSBTAG00000006703	PTGDR	protein_coding
138	10	44820482	46032038	10	45233901	45256216	22316	-	ENSBTAG00000008411	PLEKHO2	protein_coding
139	10	44820482	46032038	10	45270353	45277456	7104	+	ENSBTAG00000007638	PIF1	protein_coding
140	10	44820482	46032038	10	45313259	45339402	26144	+	ENSBTAG00000011037	RBPMS2	protein_coding
141	10	44820482	46032038	10	45366522	45379381	12860	+	ENSBTAG00000015806	OAZ2	protein_coding
142	10	44820482	46032038	10	45385273	45582446	197174	-	ENSBTAG00000015808	ZNF609	protein_coding
143	10	44820482	46032038	10	45415730	45415857	128	-	ENSBTAG00000043656	#N/A	snoRNA
144	10	44820482	46032038	10	45556247	45639746	83500	-	ENSBTAG00000014493	TRIP4	protein_coding
145	10	44820482	46032038	10	45563494	45569995	6502	+	ENSBTAG00000049725	#N/A	protein_coding
146	10	44820482	46032038	10	45645746	45653956	8211	+	ENSBTAG00000039462	PCLAF	protein_coding
147	10	44820482	46032038	10	45660900	45811429	150530	+	ENSBTAG00000016823	CSNK1G1	protein_coding
148	10	44820482	46032038	10	45806201	45806528	328	+	ENSBTAG00000049412	#N/A	protein_coding
149	10	44820482	46032038	10	45818677	45824619	5943	+	ENSBTAG00000016822	PPIB	protein_coding
150	10	44820482	46032038	10	45824595	45830579	5985	-	ENSBTAG00000016821	SNX22	protein_coding
151	10	44820482	46032038	10	45843188	45880562	37375	-	ENSBTAG00000002014	SNX1	protein_coding
152	10	44820482	46032038	10	45874156	45874262	107	-	ENSBTAG00000050918	U6	snRNA
153	10	44820482	46032038	10	45880414	45895812	15399	+	ENSBTAG00000002012	CIAO2A	protein_coding
154	10	44820482	46032038	10	45948472	46088593	140122	+	ENSBTAG00000011820	DAPK2	protein_coding
155	11	67243961	69096131	11	67271674	67278790	7117	+	ENSBTAG00000038835	GKN3P	protein_coding
156	11	67243961	69096131	11	67286584	67291599	5016	-	ENSBTAG00000017199	GKN2	protein_coding
157	11	67243961	69096131	11	67308836	67314682	5847	+	ENSBTAG00000012949	GKN1	protein_coding
158	11	67243961	69096131	11	67359790	67615063	255274	+	ENSBTAG00000007808	ANTXR1	protein_coding
159	11	67243961	69096131	11	67443407	67443736	330	+	ENSBTAG00000043661	7SK	misc_RNA
160	11	67243961	69096131	11	67708302	67766635	58334	-	ENSBTAG00000017626	GFPT1	protein_coding
161	11	67243961	69096131	11	67778940	67807964	29025	-	ENSBTAG00000000141	NFU1	protein_coding
162	11	67243961	69096131	11	67828491	67990881	162391	-	ENSBTAG00000009343	AAK1	protein_coding
163	11	67243961	69096131	11	68096833	68171538	74706	+	ENSBTAG00000001105	ANXA4	protein_coding
164	11	67243961	69096131	11	68176875	68232649	55775	+	ENSBTAG00000001108	GMCL1	protein_coding
165	11	67243961	69096131	11	68242066	68249964	7899	+	ENSBTAG00000037746	SNRNP27	protein_coding
166	11	67243961	69096131	11	68259932	68282685	22754	+	ENSBTAG00000001042	MXD1	protein_coding
167	11	67243961	69096131	11	68302507	68304476	1970	-	ENSBTAG00000006497	ASPRV1	protein_coding
168	11	67243961	69096131	11	68411350	68430059	18710	+	ENSBTAG00000008985	PCBP1	protein_coding
169	11	67243961	69096131	11	68474083	68513151	39069	-	ENSBTAG00000016939	C11H2orf42	protein_coding
170	11	67243961	69096131	11	68523385	68555041	31657	-	ENSBTAG00000019182	TIA1	protein_coding
171	11	67243961	69096131	11	68588196	68599750	11555	+	ENSBTAG00000002783	PCYOX1	protein_coding
172	11	67243961	69096131	11	68602486	68611488	9003	-	ENSBTAG00000053210	SNRPG	protein_coding
173	11	67243961	69096131	11	68659832	68688786	28955	-	ENSBTAG00000001662	EHD3	protein_coding
174	11	67243961	69096131	11	68715819	68742726	26908	+	ENSBTAG00000015865	CAPN14	protein_coding
175	11	67243961	69096131	11	68772415	68987963	215549	+	ENSBTAG00000021735	GALNT14	protein_coding
176	11	67243961	69096131	11	69068510	69144508	75999	+	ENSBTAG00000008946	CAPN13	protein_coding
177	12	40237435	41970427	12	40575909	40601637	25729	-	ENSBTAG00000019340	PCDH9	protein_coding
178	14	24167298	25953073	14	24365744	24432635	66892	+	ENSBTAG00000050550	FAM110B	protein_coding
179	14	24167298	25953073	14	24496775	24496930	156	+	ENSBTAG00000047136	#N/A	protein_coding
180	14	24167298	25953073	14	24577095	24587122	10028	-	ENSBTAG00000051748	#N/A	lncRNA
181	14	24167298	25953073	14	24587138	24624435	37298	+	ENSBTAG00000009138	UBXN2B	protein_coding
182	14	24167298	25953073	14	24664833	24675169	10337	-	ENSBTAG00000005287	CYP7A1	protein_coding
183	14	24167298	25953073	14	24696870	24697033	164	-	ENSBTAG00000033622	U1	snRNA
184	14	24167298	25953073	14	24728895	24763264	34370	+	ENSBTAG00000019910	SDCBP	protein_coding
185	14	24167298	25953073	14	24765312	24830983	65672	-	ENSBTAG00000008958	NSMAF	protein_coding
186	14	24167298	25953073	14	24946881	25258596	311716	-	ENSBTAG00000004954	TOX	protein_coding
187	14	24167298	25953073	14	25804210	25805643	1434	-	ENSBTAG00000054521	#N/A	protein_coding
188	14	50608626	51640291	14	50805781	50806991	1211	+	ENSBTAG00000039068	CSMD3	protein_coding
189	14	50608626	51640291	14	50969629	52273953	1304325	+	ENSBTAG00000038281	CSMD3	protein_coding
190	15	1215097	1819862	15	1297522	1307632	10111	+	ENSBTAG00000050890	IZUMO1R	protein_coding
191	15	1215097	1819862	15	1393141	1407039	13899	-	ENSBTAG00000008923	GPR83	protein_coding
192	15	1215097	1819862	15	1437975	1508799	70825	-	ENSBTAG00000008925	MRE11	protein_coding
193	15	1215097	1819862	15	1508947	1526908	17962	+	ENSBTAG00000009176	ANKRD49	protein_coding
194	15	1215097	1819862	15	1567371	1595200	27830	-	ENSBTAG00000012279	AASDHPPT	protein_coding
195	15	1215097	1819862	15	1658125	1664400	6276	+	ENSBTAG00000005392	KBTBD3	protein_coding
196	15	1215097	1819862	15	1765943	1776398	10456	+	ENSBTAG00000023989	MSANTD4	protein_coding
197	18	23515690	24470198	18	23606056	23612021	5966	+	ENSBTAG00000016407	IRX6	protein_coding
198	18	23515690	24470198	18	23752891	23780118	27228	+	ENSBTAG00000019267	MMP2	protein_coding
199	18	23515690	24470198	18	23786207	23854907	68701	+	ENSBTAG00000019272	LPCAT2	protein_coding
200	18	23515690	24470198	18	23827050	23827156	107	+	ENSBTAG00000051128	U6	snRNA
201	18	23515690	24470198	18	23875374	23939382	64009	+	ENSBTAG00000003353	SLC6A2	protein_coding
202	18	23515690	24470198	18	23935627	23936259	633	-	ENSBTAG00000032702	#N/A	processed_pseudogene
203	18	23515690	24470198	18	23948128	23975139	27012	+	ENSBTAG00000011021	CES1	protein_coding
204	18	23515690	24470198	18	23983413	24015657	32245	+	ENSBTAG00000001851	#N/A	protein_coding
205	18	23515690	24470198	18	24023262	24026381	3120	-	ENSBTAG00000054808	MT1A	protein_coding
206	18	23515690	24470198	18	24029352	24032186	2835	-	ENSBTAG00000038706	MT1E	protein_coding
207	18	23515690	24470198	18	24034444	24035790	1347	-	ENSBTAG00000001595	MT1E	protein_coding
208	18	23515690	24470198	18	24042348	24043480	1133	-	ENSBTAG00000023659	MT2A	protein_coding
209	18	23515690	24470198	18	24051082	24052904	1823	-	ENSBTAG00000016886	MT3	protein_coding
210	18	23515690	24470198	18	24060356	24061387	1032	-	ENSBTAG00000049147	#N/A	protein_coding
211	18	23515690	24470198	18	24074703	24075719	1017	+	ENSBTAG00000049538	#N/A	protein_coding
212	18	23515690	24470198	18	24080218	24082545	2328	-	ENSBTAG00000015084	MT4	protein_coding
213	18	23515690	24470198	18	24122099	24148233	26135	+	ENSBTAG00000014923	BBS2	protein_coding
214	18	23515690	24470198	18	24154462	24184693	30232	-	ENSBTAG00000001171	OGFOD1	protein_coding
215	18	23515690	24470198	18	24181541	24181647	107	+	ENSBTAG00000055230	U6	snRNA
216	18	23515690	24470198	18	24184906	24199512	14607	+	ENSBTAG00000010207	NUDT21	protein_coding
217	18	23515690	24470198	18	24207779	24253288	45510	+	ENSBTAG00000003798	AMFR	protein_coding
218	18	23515690	24470198	18	24255762	24437386	181625	-	ENSBTAG00000003794	GNAO1	protein_coding
219	19	34233799	35283135	19	34214709	34270099	55391	-	ENSBTAG00000003700	SLC5A10	protein_coding
220	19	34233799	35283135	19	34230241	34260820	30580	+	ENSBTAG00000003705	FAM83G	protein_coding
221	19	34233799	35283135	19	34274658	34296563	21906	-	ENSBTAG00000014858	PRPSAP2	protein_coding
222	19	34233799	35283135	19	34334364	34350038	15675	+	ENSBTAG00000017094	SHMT1	protein_coding
223	19	34233799	35283135	19	34353294	34358390	5097	-	ENSBTAG00000017090	SMCR8	protein_coding
224	19	34233799	35283135	19	34359100	34379578	20479	+	ENSBTAG00000017087	TOP3A	protein_coding
225	19	34233799	35283135	19	34382621	34386321	3701	-	ENSBTAG00000017081	MIEF2	protein_coding
226	19	34233799	35283135	19	34386823	34398726	11904	+	ENSBTAG00000016161	FLII	protein_coding
227	19	34233799	35283135	19	34398896	34413732	14837	-	ENSBTAG00000004635	LLGL1	protein_coding
228	19	34233799	35283135	19	34422370	34439576	17207	-	ENSBTAG00000025046	ALKBH5	protein_coding
229	19	34233799	35283135	19	34454036	34458648	4613	-	ENSBTAG00000052097	#N/A	protein_coding
230	19	34233799	35283135	19	34497627	34506489	8863	-	ENSBTAG00000006517	DRG2	protein_coding
231	19	34233799	35283135	19	34509785	34524187	14403	-	ENSBTAG00000008802	GID4	protein_coding
232	19	34233799	35283135	19	34524223	34536057	11835	+	ENSBTAG00000008801	ATPAF2	protein_coding
233	19	34233799	35283135	19	34536462	34556509	20048	-	ENSBTAG00000008798	DRC3	protein_coding
234	19	34233799	35283135	19	34556866	34625228	68363	+	ENSBTAG00000003983	TOM1L2	protein_coding
235	19	34233799	35283135	19	34633133	34649213	16081	+	ENSBTAG00000007884	SREBF1	protein_coding
236	19	34233799	35283135	19	34647548	34647641	94	+	ENSBTAG00000036437	bta-mir-33b	miRNA
237	19	34233799	35283135	19	34650992	34752887	101896	-	ENSBTAG00000004768	RAI1	protein_coding
238	19	34233799	35283135	19	34780764	34816442	35679	+	ENSBTAG00000016432	PEMT	protein_coding
239	19	34233799	35283135	19	34819717	34821443	1727	+	ENSBTAG00000020520	RASD1	protein_coding
240	19	34233799	35283135	19	34822995	34828048	5054	-	ENSBTAG00000020517	MED9	protein_coding
241	19	34233799	35283135	19	34833642	34835346	1705	-	ENSBTAG00000055047	#N/A	lncRNA
242	19	34233799	35283135	19	34870103	34882343	12241	-	ENSBTAG00000030820	NT5M	protein_coding
243	19	34233799	35283135	19	34886735	34905324	18590	+	ENSBTAG00000018973	COPS3	protein_coding
244	19	34233799	35283135	19	34915672	34932182	16511	+	ENSBTAG00000008010	FLCN	protein_coding
245	19	34233799	35283135	19	34939346	34942156	2811	+	ENSBTAG00000008009	PLD6	protein_coding
246	19	34233799	35283135	19	34949651	35042578	92928	-	ENSBTAG00000010534	MPRIP	protein_coding
247	19	34233799	35283135	19	35095243	35118131	22889	+	ENSBTAG00000015298	TNFRSF13B	protein_coding
248	19	34233799	35283135	19	35124073	35142894	18822	-	ENSBTAG00000008978	USP22	protein_coding
249	19	34233799	35283135	19	35154281	35160412	6132	-	ENSBTAG00000054465	#N/A	lncRNA
250	19	34233799	35283135	19	35165031	35212185	47155	+	ENSBTAG00000010559	DHRS7B	protein_coding
251	19	34233799	35283135	19	35182407	35185854	3448	+	ENSBTAG00000054307	#N/A	protein_coding
252	19	34233799	35283135	19	35212505	35235654	23150	-	ENSBTAG00000010566	TMEM11	protein_coding
253	19	34233799	35283135	19	35255751	35273731	17981	+	ENSBTAG00000010576	MAP2K3	protein_coding
254	20	44099958	45220153	20	45020646	45020764	119	+	ENSBTAG00000043813	5S_rRNA	rRNA
255	22	48961009	52638988	22	48962168	48965810	3643	+	ENSBTAG00000037377	ABHD14B	protein_coding
256	22	48961009	52638988	22	48966805	48976850	10046	+	ENSBTAG00000018622	PCBP4	protein_coding
257	22	48961009	52638988	22	48976816	48978925	2110	-	ENSBTAG00000013442	GPR62	protein_coding
258	22	48961009	52638988	22	48984160	48989507	5348	-	ENSBTAG00000000671	PARP3	protein_coding
259	22	48961009	52638988	22	48990198	48998979	8782	+	ENSBTAG00000000670	RRP9	protein_coding
260	22	48961009	52638988	22	48997519	49029107	31589	-	ENSBTAG00000032279	IQCF2	protein_coding
261	22	48961009	52638988	22	49003339	49006034	2696	+	ENSBTAG00000000805	IQCF1	protein_coding
262	22	48961009	52638988	22	49011889	49013783	1895	+	ENSBTAG00000040574	IQCF5	protein_coding
263	22	48961009	52638988	22	49034196	49041106	6911	-	ENSBTAG00000054379	#N/A	protein_coding
264	22	48961009	52638988	22	49048876	49052860	3985	-	ENSBTAG00000037410	#N/A	protein_coding
265	22	48961009	52638988	22	49075129	49079635	4507	+	ENSBTAG00000045942	IQCF6	protein_coding
266	22	48961009	52638988	22	49105357	49105932	576	+	ENSBTAG00000039664	#N/A	protein_coding
267	22	48961009	52638988	22	49118416	49127374	8959	-	ENSBTAG00000001067	GRM2	protein_coding
268	22	48961009	52638988	22	49131857	49162180	30324	-	ENSBTAG00000034796	TEX264	protein_coding
269	22	48961009	52638988	22	49169587	49277563	107977	-	ENSBTAG00000032253	RAD54L2	protein_coding
270	22	48961009	52638988	22	49282339	49370178	87840	+	ENSBTAG00000006501	DCAF1	protein_coding
271	22	48961009	52638988	22	49374567	49377717	3151	-	ENSBTAG00000006500	RBM15B	protein_coding
272	22	48961009	52638988	22	49379095	49383627	4533	-	ENSBTAG00000031797	MANF	protein_coding
273	22	48961009	52638988	22	49387098	49668868	281771	-	ENSBTAG00000001874	DOCK3	protein_coding
274	22	48961009	52638988	22	49688187	49688248	62	-	ENSBTAG00000047517	#N/A	miRNA
275	22	48961009	52638988	22	49711610	49740232	28623	-	ENSBTAG00000016532	MAPKAPK3	protein_coding
276	22	48961009	52638988	22	49749512	49755490	5979	+	ENSBTAG00000022622	CISH	protein_coding
277	22	48961009	52638988	22	49767036	49789516	22481	-	ENSBTAG00000004120	HEMK1	protein_coding
278	22	48961009	52638988	22	49790596	49799038	8443	+	ENSBTAG00000010165	C22H3orf18	protein_coding
279	22	48961009	52638988	22	49872343	49986489	114147	+	ENSBTAG00000009489	CACNA2D2	protein_coding
280	22	48961009	52638988	22	49988945	50001031	12087	+	ENSBTAG00000019161	NPRL2	protein_coding
281	22	48961009	52638988	22	49994656	49997571	2916	-	ENSBTAG00000019163	CYB561D2	protein_coding
282	22	48961009	52638988	22	50002503	50006742	4240	+	ENSBTAG00000020965	ZMYND10	protein_coding
283	22	48961009	52638988	22	50006693	50015926	9234	+	ENSBTAG00000020963	RASSF1	protein_coding
284	22	48961009	52638988	22	50016339	50026835	10497	+	ENSBTAG00000000484	HYAL2	protein_coding
285	22	48961009	52638988	22	50029859	50032903	3045	+	ENSBTAG00000000483	HYAL1	protein_coding
286	22	48961009	52638988	22	50034120	50039436	5317	+	ENSBTAG00000052388	HYAL3	protein_coding
287	22	48961009	52638988	22	50035332	50036349	1018	+	ENSBTAG00000038084	NAA80	protein_coding
288	22	48961009	52638988	22	50039840	50066774	26935	+	ENSBTAG00000000480	IFRD2	protein_coding
289	22	48961009	52638988	22	50067283	50069527	2245	-	ENSBTAG00000000478	LSMEM2	protein_coding
290	22	48961009	52638988	22	50084781	50093377	8597	-	ENSBTAG00000010138	SEMA3B	protein_coding
291	22	48961009	52638988	22	50099960	50120260	20301	-	ENSBTAG00000020645	GNAI2	protein_coding
292	22	48961009	52638988	22	50131869	50146728	14860	-	ENSBTAG00000008509	SLC38A3	protein_coding
293	22	48961009	52638988	22	50152601	50157613	5013	-	ENSBTAG00000018020	GNAT1	protein_coding
294	22	48961009	52638988	22	50161374	50190175	28802	-	ENSBTAG00000018307	SEMA3F	protein_coding
295	22	48961009	52638988	22	50218344	50242674	24331	-	ENSBTAG00000006330	RBM5	protein_coding
296	22	48961009	52638988	22	50244428	50244533	106	+	ENSBTAG00000042160	U6	snRNA
297	22	48961009	52638988	22	50246619	50336220	89602	-	ENSBTAG00000006328	RBM6	protein_coding
298	22	48961009	52638988	22	50272871	50274445	1575	+	ENSBTAG00000053287	#N/A	protein_coding
299	22	48961009	52638988	22	50335610	50335875	266	-	ENSBTAG00000054602	#N/A	pseudogene
300	22	48961009	52638988	22	50341652	50353722	12071	+	ENSBTAG00000020047	MON1A	protein_coding
301	22	48961009	52638988	22	50357168	50370270	13103	+	ENSBTAG00000015046	MST1R	protein_coding
302	22	48961009	52638988	22	50379122	50382736	3615	+	ENSBTAG00000040083	#N/A	protein_coding
303	22	48961009	52638988	22	50386354	50397870	11517	+	ENSBTAG00000004878	CAMKV	protein_coding
304	22	48961009	52638988	22	50399202	50417063	17862	+	ENSBTAG00000004877	TRAIP	protein_coding
305	22	48961009	52638988	22	50420590	50430092	9503	+	ENSBTAG00000012335	UBA7	protein_coding
306	22	48961009	52638988	22	50430296	50432582	2287	-	ENSBTAG00000012322	INKA1	protein_coding
307	22	48961009	52638988	22	50434292	50441745	7454	+	ENSBTAG00000005728	CDHR4	protein_coding
308	22	48961009	52638988	22	50443820	50481306	37487	+	ENSBTAG00000011595	IP6K1	protein_coding
309	22	48961009	52638988	22	50481628	50484009	2382	+	ENSBTAG00000032026	GMPPB	protein_coding
310	22	48961009	52638988	22	50484030	50507304	23275	-	ENSBTAG00000011588	RNF123	protein_coding
311	22	48961009	52638988	22	50485830	50487389	1560	+	ENSBTAG00000045547	AMIGO3	protein_coding
312	22	48961009	52638988	22	50509885	50514786	4902	+	ENSBTAG00000011585	MST1	protein_coding
313	22	48961009	52638988	22	50515197	50525786	10590	-	ENSBTAG00000011583	APEH	protein_coding
314	22	48961009	52638988	22	50533323	50568056	34734	-	ENSBTAG00000011581	BSN	protein_coding
315	22	48961009	52638988	22	50616593	50663265	46673	-	ENSBTAG00000011580	DAG1	protein_coding
316	22	48961009	52638988	22	50688543	50692789	4247	+	ENSBTAG00000000387	NICN1	protein_coding
317	22	48961009	52638988	22	50693259	50697601	4343	+	ENSBTAG00000002321	AMT	protein_coding
318	22	48961009	52638988	22	50697897	50700780	2884	-	ENSBTAG00000022632	TCTA	protein_coding
319	22	48961009	52638988	22	50701226	50751132	49907	+	ENSBTAG00000004279	RHOA	protein_coding
320	22	48961009	52638988	22	50752499	50753719	1221	+	ENSBTAG00000054195	GPX1	protein_coding
321	22	48961009	52638988	22	50755752	50755854	103	-	ENSBTAG00000044873	U6	snRNA
322	22	48961009	52638988	22	50762625	50803467	40843	+	ENSBTAG00000011899	USP4	protein_coding
323	22	48961009	52638988	22	50803150	50809723	6574	+	ENSBTAG00000011894	C22H3orf62	protein_coding
324	22	48961009	52638988	22	50812881	50840894	28014	-	ENSBTAG00000009371	IHO1	protein_coding
325	22	48961009	52638988	22	50846267	50854259	7993	+	ENSBTAG00000000982	C22H3orf84	protein_coding
326	22	48961009	52638988	22	50854957	50859766	4810	-	ENSBTAG00000000981	KLHDC8B	protein_coding
327	22	48961009	52638988	22	50863214	50866898	3685	+	ENSBTAG00000013932	CCDC71	protein_coding
328	22	48961009	52638988	22	50867110	50882602	15493	+	ENSBTAG00000055290	#N/A	protein_coding
329	22	48961009	52638988	22	50883645	50897890	14246	+	ENSBTAG00000022635	LAMB2	protein_coding
330	22	48961009	52638988	22	50899782	50909096	9315	+	ENSBTAG00000018921	USP19	protein_coding
331	22	48961009	52638988	22	50908307	50908557	251	+	ENSBTAG00000049609	#N/A	pseudogene
332	22	48961009	52638988	22	50911689	50919173	7485	+	ENSBTAG00000018928	QARS1	protein_coding
333	22	48961009	52638988	22	50920376	50962568	42193	+	ENSBTAG00000018924	QRICH1	protein_coding
334	22	48961009	52638988	22	50962854	50967685	4832	+	ENSBTAG00000031837	IMPDH2	protein_coding
335	22	48961009	52638988	22	50968509	50969630	1122	-	ENSBTAG00000018918	NDUFAF3	protein_coding
336	22	48961009	52638988	22	50970980	50971083	104	+	ENSBTAG00000029957	MIR191	miRNA
337	22	48961009	52638988	22	50971462	50971548	87	+	ENSBTAG00000029913	bta-mir-425	miRNA
338	22	48961009	52638988	22	50972627	50975586	2960	+	ENSBTAG00000018913	DALRD3	protein_coding
339	22	48961009	52638988	22	50975112	50983657	8546	-	ENSBTAG00000018910	WDR6	protein_coding
340	22	48961009	52638988	22	50983772	50997485	13714	-	ENSBTAG00000005490	P4HTM	protein_coding
341	22	48961009	52638988	22	51000461	51038025	37565	-	ENSBTAG00000005488	ARIH2	protein_coding
342	22	48961009	52638988	22	51045061	51080116	35056	+	ENSBTAG00000000191	SLC25A20	protein_coding
343	22	48961009	52638988	22	51085591	51155609	70019	+	ENSBTAG00000014205	PRKAR2A	protein_coding
344	22	48961009	52638988	22	51175603	51199445	23843	+	ENSBTAG00000021853	IP6K2	protein_coding
345	22	48961009	52638988	22	51201255	51213764	12510	+	ENSBTAG00000021850	NCKIPSD	protein_coding
346	22	48961009	52638988	22	51220718	51248173	27456	+	ENSBTAG00000021846	CELSR3	protein_coding
347	22	48961009	52638988	22	51249161	51259943	10783	+	ENSBTAG00000038381	SLC26A6	protein_coding
348	22	48961009	52638988	22	51261961	51264015	2055	+	ENSBTAG00000021390	TMEM89	protein_coding
349	22	48961009	52638988	22	51275073	51283826	8754	+	ENSBTAG00000019096	UQCRC1	protein_coding
350	22	48961009	52638988	22	51287420	51317102	29683	+	ENSBTAG00000019081	COL7A1	pseudogene
351	22	48961009	52638988	22	51296725	51297669	945	+	ENSBTAG00000049917	#N/A	lncRNA
352	22	48961009	52638988	22	51302648	51303302	655	+	ENSBTAG00000052088	#N/A	lncRNA
353	22	48961009	52638988	22	51309396	51310614	1219	+	ENSBTAG00000049028	#N/A	lncRNA
354	22	48961009	52638988	22	51318728	51319066	339	+	ENSBTAG00000019078	UCN2	protein_coding
355	22	48961009	52638988	22	51322004	51363442	41439	+	ENSBTAG00000006752	PFKFB4	protein_coding
356	22	48961009	52638988	22	51371186	51399168	27983	+	ENSBTAG00000009183	SHISA5	protein_coding
357	22	48961009	52638988	22	51389456	51391480	2025	-	ENSBTAG00000048942	#N/A	protein_coding
358	22	48961009	52638988	22	51399388	51401262	1875	-	ENSBTAG00000008406	TREX1	protein_coding
359	22	48961009	52638988	22	51401422	51419086	17665	-	ENSBTAG00000008399	ATRIP	protein_coding
360	22	48961009	52638988	22	51421537	51423482	1946	-	ENSBTAG00000053755	TMA7	protein_coding
361	22	48961009	52638988	22	51422933	51433253	10321	+	ENSBTAG00000013413	CCDC51	protein_coding
362	22	48961009	52638988	22	51439234	51463440	24207	+	ENSBTAG00000013407	PLXNB1	protein_coding
363	22	48961009	52638988	22	51513513	51517679	4167	+	ENSBTAG00000053231	#N/A	protein_coding
364	22	48961009	52638988	22	51557935	51564695	6761	+	ENSBTAG00000003025	NME6	protein_coding
365	22	48961009	52638988	22	51574749	51576697	1949	-	ENSBTAG00000003022	CAMP	protein_coding
366	22	48961009	52638988	22	51579579	51621314	41736	-	ENSBTAG00000013356	CATHL3	protein_coding
367	22	48961009	52638988	22	51586120	51587500	1381	-	ENSBTAG00000052903	#N/A	protein_coding
368	22	48961009	52638988	22	51592817	51594193	1377	-	ENSBTAG00000053016	CATHL4	protein_coding
369	22	48961009	52638988	22	51607354	51608515	1162	-	ENSBTAG00000039879	#N/A	protein_coding
370	22	48961009	52638988	22	51631052	51632260	1209	-	ENSBTAG00000016153	#N/A	protein_coding
371	22	48961009	52638988	22	51641063	51642757	1695	-	ENSBTAG00000024852	CATHL2	protein_coding
372	22	48961009	52638988	22	51653980	51655076	1097	-	ENSBTAG00000031594	#N/A	protein_coding
373	22	48961009	52638988	22	51662801	51665452	2652	-	ENSBTAG00000049629	CATHL6	protein_coding
374	22	48961009	52638988	22	51671499	51673833	2335	-	ENSBTAG00000020076	CATHL5	protein_coding
375	22	48961009	52638988	22	51693533	51717133	23601	+	ENSBTAG00000009586	CDC25A	protein_coding
376	22	48961009	52638988	22	51700922	51701030	109	+	ENSBTAG00000044607	5S_rRNA	rRNA
377	22	48961009	52638988	22	51723115	51724720	1606	+	ENSBTAG00000054831	#N/A	lncRNA
378	22	48961009	52638988	22	51814681	51907742	93062	+	ENSBTAG00000015839	MAP4	protein_coding
379	22	48961009	52638988	22	51910393	51929087	18695	-	ENSBTAG00000015833	DHX30	protein_coding
380	22	48961009	52638988	22	51930143	51930266	124	-	ENSBTAG00000052616	#N/A	misc_RNA
381	22	48961009	52638988	22	51958135	52083698	125564	+	ENSBTAG00000031567	SMARCC1	protein_coding
382	22	48961009	52638988	22	52089753	52102048	12296	+	ENSBTAG00000002309	CSPG5	protein_coding
383	22	48961009	52638988	22	52133185	52149780	16596	+	ENSBTAG00000011478	ELP6	protein_coding
384	22	48961009	52638988	22	52163455	52264116	100662	+	ENSBTAG00000015782	SCAP	protein_coding
385	22	48961009	52638988	22	52202199	52202301	103	+	ENSBTAG00000042921	U6	snRNA
386	22	48961009	52638988	22	52252195	52252575	381	-	ENSBTAG00000051878	#N/A	protein_coding
387	22	48961009	52638988	22	52263501	52284441	20941	-	ENSBTAG00000002774	PTPN23	protein_coding
388	22	48961009	52638988	22	52297736	52301963	4228	+	ENSBTAG00000031519	NGP	protein_coding
389	22	48961009	52638988	22	52298693	52321362	22670	-	ENSBTAG00000055088	#N/A	protein_coding
390	22	48961009	52638988	22	52310680	52361884	51205	-	ENSBTAG00000006573	KLHL18	protein_coding
391	22	48961009	52638988	22	52361996	52398789	36794	+	ENSBTAG00000019841	KIF9	protein_coding
392	22	48961009	52638988	22	52369998	52370303	306	-	ENSBTAG00000050457	#N/A	protein_coding
393	22	48961009	52638988	22	52404638	52405957	1320	+	ENSBTAG00000053089	#N/A	protein_coding
394	22	48961009	52638988	22	52450147	52509045	58899	+	ENSBTAG00000002948	SETD2	protein_coding
395	22	48961009	52638988	22	52511365	52515665	4301	-	ENSBTAG00000022598	NRADD	protein_coding
396	22	48961009	52638988	22	52516340	52541668	25329	-	ENSBTAG00000048957	#N/A	pseudogene
397	22	48961009	52638988	22	52548484	52585071	36588	+	ENSBTAG00000011311	CCDC12	protein_coding
398	22	48961009	52638988	22	52597375	52624332	26958	-	ENSBTAG00000016948	PTH1R	protein_coding
399	22	48961009	52638988	22	52638016	52644842	6827	+	ENSBTAG00000008394	MYL3	protein_coding
400	23	26021	1697122	23	47489	47607	119	-	ENSBTAG00000053364	5S_rRNA	rRNA
401	23	26021	1697122	23	270838	961226	690389	-	ENSBTAG00000043990	KHDRBS2	protein_coding
402	24	40975659	41855725	24	40329648	40995218	665571	+	ENSBTAG00000024015	PTPRM	protein_coding
403	24	40975659	41855725	24	41066770	41071466	4697	+	ENSBTAG00000048535	#N/A	lncRNA
404	24	40975659	41855725	24	41067634	41069508	1875	-	ENSBTAG00000055044	#N/A	lncRNA
405	24	40975659	41855725	24	41081076	41101417	20342	+	ENSBTAG00000010356	RAB12	protein_coding
406	24	40975659	41855725	24	41135878	41248489	112612	+	ENSBTAG00000009459	MTCL1	protein_coding
407	24	40975659	41855725	24	41415091	41433991	18901	+	ENSBTAG00000004871	NDUFV2	protein_coding
408	24	40975659	41855725	24	41438728	41534782	96055	+	ENSBTAG00000002755	ANKRD12	protein_coding
409	24	40975659	41855725	24	41545935	41567726	21792	+	ENSBTAG00000001805	TWSG1	protein_coding
410	24	40975659	41855725	24	41621467	41638744	17278	+	ENSBTAG00000021250	RALBP1	protein_coding
411	24	40975659	41855725	24	41652235	41701148	48914	-	ENSBTAG00000009822	PPP4R1	protein_coding
412	24	40975659	41855725	24	41786924	41868538	81615	+	ENSBTAG00000046533	RAB31	protein_coding
413	24	40975659	41855725	24	41847067	41848257	1191	-	ENSBTAG00000051035	#N/A	protein_coding
