# Supplementary material for: Genetic and Genomic Characterization of a New Beef Cattle Composite Breed (Purunã) Developed for Production in Pasture-Based Systems
Source: Front Genet. 2022 Jul 18;13:858970. doi: 10.3389/fgene.2022.858970 (PMC9341487; doi:10.3389/fgene.2022.858970)
Supplement: Supplementary file 3 [file Table1.XLSX]

## Sheet: Sheet1
	CHR	BP1	BP2	chr	start_pos	end_pos	width	strand	gene_id	gene_name	gene_biotype
1	5	54304681	62031799	5	54534181	54534687	507	-	ENSBTAG00000055101	#N/A	protein_coding
2	5	54304681	62031799	5	54560835	54612806	51972	+	ENSBTAG00000002227	LRIG3	protein_coding
3	5	54304681	62031799	5	55516050	55539039	22990	-	ENSBTAG00000017543	ATP23	protein_coding
4	5	54304681	62031799	5	55634355	55656768	22414	+	ENSBTAG00000016508	CTDSP2	protein_coding
5	5	54304681	62031799	5	55652073	55652156	84	+	ENSBTAG00000029869	bta-mir-26a-2	miRNA
6	5	54304681	62031799	5	55657654	55676222	18569	+	ENSBTAG00000016913	AVIL	protein_coding
7	5	54304681	62031799	5	55677211	55685370	8160	-	ENSBTAG00000016912	TSFM	protein_coding
8	5	54304681	62031799	5	55685470	55699636	14167	-	ENSBTAG00000016910	EEF1AKMT3	protein_coding
9	5	54304681	62031799	5	55693579	55697768	4190	+	ENSBTAG00000016908	METTL1	protein_coding
10	5	54304681	62031799	5	55698030	55704141	6112	+	ENSBTAG00000016906	CYP27B1	protein_coding
11	5	54304681	62031799	5	55705886	55710394	4509	-	ENSBTAG00000016904	MARCHF9	protein_coding
12	5	54304681	62031799	5	55713433	55717031	3599	+	ENSBTAG00000007160	CDK4	protein_coding
13	5	54304681	62031799	5	55716601	55719301	2701	-	ENSBTAG00000007158	TSPAN31	protein_coding
14	5	54304681	62031799	5	55721786	55736914	15129	+	ENSBTAG00000007156	AGAP2	protein_coding
15	5	54304681	62031799	5	55731741	55779980	48240	-	ENSBTAG00000007152	OS9	protein_coding
16	5	54304681	62031799	5	55780373	55780606	234	+	ENSBTAG00000050652	#N/A	protein_coding
17	5	54304681	62031799	5	55853206	55853442	237	-	ENSBTAG00000049386	#N/A	protein_coding
18	5	54304681	62031799	5	55856907	55863814	6908	+	ENSBTAG00000004494	B4GALNT1	protein_coding
19	5	54304681	62031799	5	55863909	55870734	6826	-	ENSBTAG00000023289	SLC26A10	protein_coding
20	5	54304681	62031799	5	55872512	55879740	7229	-	ENSBTAG00000018003	ARHGEF25	protein_coding
21	5	54304681	62031799	5	55880132	55885193	5062	-	ENSBTAG00000018002	DTX3	protein_coding
22	5	54304681	62031799	5	55886481	55898381	11901	-	ENSBTAG00000003942	PIP4K2C	protein_coding
23	5	54304681	62031799	5	55900690	55902019	1330	-	ENSBTAG00000051574	#N/A	protein_coding
24	5	54304681	62031799	5	55902461	55931562	29102	-	ENSBTAG00000021336	KIF5A	protein_coding
25	5	54304681	62031799	5	55905833	55915193	9361	+	ENSBTAG00000051593	#N/A	protein_coding
26	5	54304681	62031799	5	55932944	55946889	13946	+	ENSBTAG00000010624	DCTN2	protein_coding
27	5	54304681	62031799	5	55947935	55953054	5120	-	ENSBTAG00000010616	MBD6	protein_coding
28	5	54304681	62031799	5	55955676	55960509	4834	+	ENSBTAG00000031544	DDIT3	protein_coding
29	5	54304681	62031799	5	55960451	55988093	27643	-	ENSBTAG00000018405	MARS1	protein_coding
30	5	54304681	62031799	5	55964466	55964538	73	-	ENSBTAG00000044363	bta-mir-2430	miRNA
31	5	54304681	62031799	5	55984863	55992412	7550	+	ENSBTAG00000018403	ARHGAP9	protein_coding
32	5	54304681	62031799	5	55992686	56003064	10379	-	ENSBTAG00000006631	GLI1	protein_coding
33	5	54304681	62031799	5	56005014	56006928	1915	-	ENSBTAG00000006599	INHBE	protein_coding
34	5	54304681	62031799	5	56011447	56022178	10732	-	ENSBTAG00000019084	INHBC	protein_coding
35	5	54304681	62031799	5	56081334	56191524	110191	+	ENSBTAG00000018361	R3HDM2	protein_coding
36	5	54304681	62031799	5	56193684	56200300	6617	+	ENSBTAG00000018358	STAC3	protein_coding
37	5	54304681	62031799	5	56205859	56208161	2303	+	ENSBTAG00000031503	NDUFA4L2	protein_coding
38	5	54304681	62031799	5	56208141	56213412	5272	-	ENSBTAG00000031500	SHMT2	protein_coding
39	5	54304681	62031799	5	56216259	56225814	9556	-	ENSBTAG00000047650	NXPH4	protein_coding
40	5	54304681	62031799	5	56230519	56310118	79600	-	ENSBTAG00000010830	LRP1	protein_coding
41	5	54304681	62031799	5	56321025	56321174	150	+	ENSBTAG00000043214	SNORA62	snoRNA
42	5	54304681	62031799	5	56324073	56324140	68	-	ENSBTAG00000045218	bta-mir-2431	miRNA
43	5	54304681	62031799	5	56325609	56339539	13931	+	ENSBTAG00000006335	STAT6	protein_coding
44	5	54304681	62031799	5	56340377	56346527	6151	-	ENSBTAG00000006324	NAB2	protein_coding
45	5	54304681	62031799	5	56354793	56355368	576	-	ENSBTAG00000031076	#N/A	protein_coding
46	5	54304681	62031799	5	56356649	56375772	19124	+	ENSBTAG00000014659	NEMP1	protein_coding
47	5	54304681	62031799	5	56378741	56406111	27371	+	ENSBTAG00000014655	MYO1A	protein_coding
48	5	54304681	62031799	5	56410874	56418016	7143	+	ENSBTAG00000021807	TAC3	protein_coding
49	5	54304681	62031799	5	56432132	56434255	2124	+	ENSBTAG00000038498	ZBTB39	protein_coding
50	5	54304681	62031799	5	56441009	56443098	2090	-	ENSBTAG00000039157	GPR182	protein_coding
51	5	54304681	62031799	5	56449519	56450052	534	-	ENSBTAG00000049045	#N/A	pseudogene
52	5	54304681	62031799	5	56463654	56468834	5181	+	ENSBTAG00000049081	#N/A	protein_coding
53	5	54304681	62031799	5	56490433	56495223	4791	+	ENSBTAG00000050051	#N/A	protein_coding
54	5	54304681	62031799	5	56531475	56537384	5910	+	ENSBTAG00000001392	RDH16	protein_coding
55	5	54304681	62031799	5	56545369	56554855	9487	+	ENSBTAG00000013443	SDR9C7	protein_coding
56	5	54304681	62031799	5	56599458	56602525	3068	+	ENSBTAG00000055155	#N/A	protein_coding
57	5	54304681	62031799	5	56601985	56614396	12412	-	ENSBTAG00000051761	#N/A	protein_coding
58	5	54304681	62031799	5	56645578	56645657	80	+	ENSBTAG00000042169	#N/A	snoRNA
59	5	54304681	62031799	5	56645822	56645893	72	+	ENSBTAG00000043104	#N/A	snoRNA
60	5	54304681	62031799	5	56674172	56696104	21933	-	ENSBTAG00000011720	HSD17B6	protein_coding
61	5	54304681	62031799	5	56711750	56729540	17791	+	ENSBTAG00000044000	PRIM1	protein_coding
62	5	54304681	62031799	5	56711826	56743636	31811	+	ENSBTAG00000010701	NACA	protein_coding
63	5	54304681	62031799	5	56758238	56759353	1116	+	ENSBTAG00000055262	#N/A	protein_coding
64	5	54304681	62031799	5	56760933	56782192	21260	+	ENSBTAG00000017967	PTGES3	protein_coding
65	5	54304681	62031799	5	56789495	56795018	5524	+	ENSBTAG00000013315	ATP5F1B	protein_coding
66	5	54304681	62031799	5	56790501	56790575	75	+	ENSBTAG00000043048	SNORD59A	snoRNA
67	5	54304681	62031799	5	56791576	56791646	71	+	ENSBTAG00000042677	bta-mir-677	snoRNA
68	5	54304681	62031799	5	56791577	56791642	66	+	ENSBTAG00000049930	bta-mir-677	miRNA
69	5	54304681	62031799	5	56796775	56831748	34974	+	ENSBTAG00000017840	BAZ2A	protein_coding
70	5	54304681	62031799	5	56836859	56890516	53658	-	ENSBTAG00000017830	RBMS2	protein_coding
71	5	54304681	62031799	5	56893433	56925355	31923	-	ENSBTAG00000009281	SPRYD4	protein_coding
72	5	54304681	62031799	5	56910794	56923321	12528	+	ENSBTAG00000009284	GLS2	protein_coding
73	5	54304681	62031799	5	56934066	56938031	3966	+	ENSBTAG00000010127	MIP	protein_coding
74	5	54304681	62031799	5	56937139	56964713	27575	+	ENSBTAG00000020459	TIMELESS	protein_coding
75	5	54304681	62031799	5	56979557	56994574	15018	+	ENSBTAG00000004384	APOF	protein_coding
76	5	54304681	62031799	5	56979557	56980940	1384	+	ENSBTAG00000045969	APON	protein_coding
77	5	54304681	62031799	5	56997911	57009477	11567	+	ENSBTAG00000004380	STAT2	protein_coding
78	5	54304681	62031799	5	57009388	57011422	2035	-	ENSBTAG00000004378	IL23A	protein_coding
79	5	54304681	62031799	5	57013765	57013835	71	-	ENSBTAG00000044879	bta-mir-2432	miRNA
80	5	54304681	62031799	5	57015019	57028863	13845	+	ENSBTAG00000004376	PAN2	protein_coding
81	5	54304681	62031799	5	57031093	57034101	3009	+	ENSBTAG00000004374	CNPY2	protein_coding
82	5	54304681	62031799	5	57031227	57031292	66	+	ENSBTAG00000052591	bta-mir-12054	miRNA
83	5	54304681	62031799	5	57042171	57065001	22831	+	ENSBTAG00000004371	CS	protein_coding
84	5	54304681	62031799	5	57065720	57069211	3492	-	ENSBTAG00000004367	COQ10A	protein_coding
85	5	54304681	62031799	5	57074995	57086731	11737	+	ENSBTAG00000011762	ANKRD52	protein_coding
86	5	54304681	62031799	5	57075606	57075682	77	-	ENSBTAG00000044339	bta-mir-2433	miRNA
87	5	54304681	62031799	5	57090764	57091294	531	+	ENSBTAG00000052361	#N/A	protein_coding
88	5	54304681	62031799	5	57091706	57097226	5521	-	ENSBTAG00000002799	SLC39A5	protein_coding
89	5	54304681	62031799	5	57097196	57103340	6145	-	ENSBTAG00000002798	NABP2	protein_coding
90	5	54304681	62031799	5	57103613	57130431	26819	+	ENSBTAG00000026754	RNF41	protein_coding
91	5	54304681	62031799	5	57140987	57161786	20800	+	ENSBTAG00000014697	SMARCC2	protein_coding
92	5	54304681	62031799	5	57161869	57164985	3117	-	ENSBTAG00000010799	MYL6	protein_coding
93	5	54304681	62031799	5	57165321	57168025	2705	-	ENSBTAG00000031217	MYL6B	protein_coding
94	5	54304681	62031799	5	57179946	57194004	14059	-	ENSBTAG00000009543	ESYT1	protein_coding
95	5	54304681	62031799	5	57197914	57205232	7319	-	ENSBTAG00000009542	ZC3H10	protein_coding
96	5	54304681	62031799	5	57208094	57214801	6708	-	ENSBTAG00000010451	PA2G4	protein_coding
97	5	54304681	62031799	5	57215784	57236737	20954	-	ENSBTAG00000010444	ERBB3	protein_coding
98	5	54304681	62031799	5	57279798	57283196	3399	-	ENSBTAG00000038896	RPS26	protein_coding
99	5	54304681	62031799	5	57292528	57302803	10276	-	ENSBTAG00000012636	IKZF4	protein_coding
100	5	54304681	62031799	5	57314953	57319225	4273	-	ENSBTAG00000006160	SUOX	protein_coding
101	5	54304681	62031799	5	57321765	57337350	15586	-	ENSBTAG00000014129	RAB5B	protein_coding
102	5	54304681	62031799	5	57339030	57344446	5417	-	ENSBTAG00000004021	CDK2	protein_coding
103	5	54304681	62031799	5	57343063	57353330	10268	+	ENSBTAG00000004019	PMEL	protein_coding
104	5	54304681	62031799	5	57353452	57376105	22654	-	ENSBTAG00000004018	DGKA	protein_coding
105	5	54304681	62031799	5	57378226	57399551	21326	+	ENSBTAG00000031146	PYM1	protein_coding
106	5	54304681	62031799	5	57426768	57433048	6281	+	ENSBTAG00000009051	MMP19	protein_coding
107	5	54304681	62031799	5	57433437	57437847	4411	-	ENSBTAG00000009049	#N/A	protein_coding
108	5	54304681	62031799	5	57438695	57446182	7488	+	ENSBTAG00000020664	DNAJC14	protein_coding
109	5	54304681	62031799	5	57446157	57449119	2963	-	ENSBTAG00000020663	ORMDL2	protein_coding
110	5	54304681	62031799	5	57449443	57498922	49480	+	ENSBTAG00000020662	SARNP	protein_coding
111	5	54304681	62031799	5	57506100	57512983	6884	-	ENSBTAG00000007417	GDF11	protein_coding
112	5	54304681	62031799	5	57517950	57525614	7665	+	ENSBTAG00000051365	#N/A	lncRNA
113	5	54304681	62031799	5	57528943	57532768	3826	+	ENSBTAG00000011931	CD63	protein_coding
114	5	54304681	62031799	5	57533663	57537461	3799	-	ENSBTAG00000011927	RDH5	protein_coding
115	5	54304681	62031799	5	57538198	57541849	3652	-	ENSBTAG00000011918	BLOC1S1	protein_coding
116	5	54304681	62031799	5	57548839	57572012	23174	+	ENSBTAG00000012897	ITGA7	protein_coding
117	5	54304681	62031799	5	57572503	57575448	2946	-	ENSBTAG00000012896	METTL7B	protein_coding
118	5	54304681	62031799	5	57608661	57609680	1020	+	ENSBTAG00000006605	#N/A	protein_coding
119	5	54304681	62031799	5	57611456	57611609	154	-	ENSBTAG00000044490	#N/A	snoRNA
120	5	54304681	62031799	5	57626515	57627453	939	-	ENSBTAG00000031031	OR10P1	protein_coding
121	5	54304681	62031799	5	57641621	57642664	1044	-	ENSBTAG00000051656	#N/A	protein_coding
122	5	54304681	62031799	5	57661971	57662900	930	-	ENSBTAG00000051585	#N/A	protein_coding
123	5	54304681	62031799	5	57673709	57674653	945	-	ENSBTAG00000052738	OR2AP1	protein_coding
124	5	54304681	62031799	5	57687287	57687511	225	+	ENSBTAG00000054814	#N/A	protein_coding
125	5	54304681	62031799	5	57724117	57725043	927	-	ENSBTAG00000048372	#N/A	protein_coding
126	5	54304681	62031799	5	57740889	57741833	945	-	ENSBTAG00000049847	#N/A	protein_coding
127	5	54304681	62031799	5	57787718	57788656	939	+	ENSBTAG00000052662	#N/A	protein_coding
128	5	54304681	62031799	5	57807632	57808585	954	-	ENSBTAG00000054300	#N/A	protein_coding
129	5	54304681	62031799	5	57855480	57856406	927	-	ENSBTAG00000052908	#N/A	protein_coding
130	5	54304681	62031799	5	57878122	57879057	936	-	ENSBTAG00000021122	#N/A	protein_coding
131	5	54304681	62031799	5	57908786	57909721	936	-	ENSBTAG00000053821	#N/A	protein_coding
132	5	54304681	62031799	5	57924954	57925916	963	-	ENSBTAG00000052453	#N/A	protein_coding
133	5	54304681	62031799	5	58001219	58001322	104	-	ENSBTAG00000053506	U6	snRNA
134	5	54304681	62031799	5	58067915	58068868	954	-	ENSBTAG00000047825	#N/A	protein_coding
135	5	54304681	62031799	5	58099644	58100579	936	-	ENSBTAG00000052093	#N/A	protein_coding
136	5	54304681	62031799	5	58112291	58113238	948	-	ENSBTAG00000049329	#N/A	protein_coding
137	5	54304681	62031799	5	58126697	58127632	936	-	ENSBTAG00000051156	#N/A	protein_coding
138	5	54304681	62031799	5	58179582	58180520	939	-	ENSBTAG00000046778	#N/A	protein_coding
139	5	54304681	62031799	5	58207468	58208403	936	-	ENSBTAG00000048295	#N/A	protein_coding
140	5	54304681	62031799	5	58254940	58255851	912	+	ENSBTAG00000054507	#N/A	pseudogene
141	5	54304681	62031799	5	58271115	58272053	939	-	ENSBTAG00000050480	#N/A	protein_coding
142	5	54304681	62031799	5	58285201	58286139	939	-	ENSBTAG00000051165	#N/A	protein_coding
143	5	54304681	62031799	5	58371500	58372442	943	-	ENSBTAG00000051462	#N/A	pseudogene
144	5	54304681	62031799	5	58418220	58419158	939	+	ENSBTAG00000049219	#N/A	protein_coding
145	5	54304681	62031799	5	58448566	58449501	936	-	ENSBTAG00000051274	#N/A	protein_coding
146	5	54304681	62031799	5	58463626	58464561	936	-	ENSBTAG00000048779	#N/A	protein_coding
147	5	54304681	62031799	5	58516084	58517061	978	-	ENSBTAG00000006313	OR6C76	protein_coding
148	5	54304681	62031799	5	58550539	58551477	939	-	ENSBTAG00000053837	OR6C75	protein_coding
149	5	54304681	62031799	5	58594819	58595757	939	-	ENSBTAG00000049581	#N/A	protein_coding
150	5	54304681	62031799	5	58618611	58619627	1017	+	ENSBTAG00000049184	#N/A	protein_coding
151	5	54304681	62031799	5	58694733	58695704	972	+	ENSBTAG00000048408	#N/A	protein_coding
152	5	54304681	62031799	5	58757261	58758202	942	-	ENSBTAG00000024691	#N/A	protein_coding
153	5	54304681	62031799	5	58765574	58766512	939	-	ENSBTAG00000051265	#N/A	protein_coding
154	5	54304681	62031799	5	58854800	58855759	960	-	ENSBTAG00000050381	#N/A	protein_coding
155	5	54304681	62031799	5	58878862	58879806	945	-	ENSBTAG00000049213	#N/A	protein_coding
156	5	54304681	62031799	5	58889511	58890449	939	-	ENSBTAG00000054097	#N/A	protein_coding
157	5	54304681	62031799	5	58916500	58917462	963	+	ENSBTAG00000049016	#N/A	protein_coding
158	5	54304681	62031799	5	58924061	58925038	978	+	ENSBTAG00000045922	#N/A	protein_coding
159	5	54304681	62031799	5	58935476	58936415	940	+	ENSBTAG00000048168	#N/A	pseudogene
160	5	54304681	62031799	5	58939691	58940650	960	-	ENSBTAG00000053702	#N/A	protein_coding
161	5	54304681	62031799	5	59004836	59005767	932	-	ENSBTAG00000054733	#N/A	pseudogene
162	5	54304681	62031799	5	59015180	59016118	939	-	ENSBTAG00000049913	#N/A	protein_coding
163	5	54304681	62031799	5	59045501	59046562	1062	-	ENSBTAG00000051198	#N/A	protein_coding
164	5	54304681	62031799	5	59075467	59076405	939	-	ENSBTAG00000002913	#N/A	protein_coding
165	5	54304681	62031799	5	59116116	59117060	945	+	ENSBTAG00000051990	#N/A	protein_coding
166	5	54304681	62031799	5	59161107	59162045	939	-	ENSBTAG00000048864	#N/A	protein_coding
167	5	54304681	62031799	5	59174046	59174975	930	-	ENSBTAG00000046446	#N/A	protein_coding
168	5	54304681	62031799	5	59261341	59262279	939	-	ENSBTAG00000049753	#N/A	protein_coding
169	5	54304681	62031799	5	59281584	59282522	939	-	ENSBTAG00000054193	#N/A	protein_coding
170	5	54304681	62031799	5	59304450	59305400	951	-	ENSBTAG00000039756	OR10A7	protein_coding
171	5	54304681	62031799	5	59320329	59321321	993	+	ENSBTAG00000049751	#N/A	protein_coding
172	5	54304681	62031799	5	59326016	59327008	993	+	ENSBTAG00000053229	#N/A	protein_coding
173	5	54304681	62031799	5	59331705	59332697	993	+	ENSBTAG00000053772	#N/A	protein_coding
174	5	54304681	62031799	5	59364927	59365874	948	-	ENSBTAG00000037629	#N/A	protein_coding
175	5	54304681	62031799	5	59414003	59414972	970	+	ENSBTAG00000052581	#N/A	pseudogene
176	5	54304681	62031799	5	59441530	59442483	954	+	ENSBTAG00000052799	#N/A	protein_coding
177	5	54304681	62031799	5	59465929	59466885	957	+	ENSBTAG00000054478	#N/A	protein_coding
178	5	54304681	62031799	5	59500353	59501387	1035	+	ENSBTAG00000038567	#N/A	protein_coding
179	5	54304681	62031799	5	59524006	59530242	6237	+	ENSBTAG00000045722	#N/A	protein_coding
180	5	54304681	62031799	5	59559256	59560269	1014	+	ENSBTAG00000050988	#N/A	protein_coding
181	5	54304681	62031799	5	59619848	59620804	957	-	ENSBTAG00000054855	#N/A	protein_coding
182	5	54304681	62031799	5	59658165	59661271	3107	-	ENSBTAG00000046317	#N/A	protein_coding
183	5	54304681	62031799	5	59680315	59681292	978	-	ENSBTAG00000053957	#N/A	protein_coding
184	5	54304681	62031799	5	59723790	59724731	942	-	ENSBTAG00000048994	#N/A	protein_coding
185	5	54304681	62031799	5	59745045	59746001	957	-	ENSBTAG00000049374	#N/A	protein_coding
186	5	54304681	62031799	5	59767194	59768172	979	-	ENSBTAG00000049680	#N/A	pseudogene
187	5	54304681	62031799	5	59800152	59801093	942	+	ENSBTAG00000049342	#N/A	protein_coding
188	5	54304681	62031799	5	59885089	59886081	993	-	ENSBTAG00000005626	NEUROD4	protein_coding
189	5	54304681	62031799	5	59925024	59961156	36133	+	ENSBTAG00000005120	TESPA1	protein_coding
190	5	54304681	62031799	5	60031676	60161682	130007	-	ENSBTAG00000003183	NTN4	protein_coding
191	5	54304681	62031799	5	60070308	60070414	107	+	ENSBTAG00000053604	U6	snRNA
192	5	54304681	62031799	5	60126818	60128044	1227	+	ENSBTAG00000052178	#N/A	protein_coding
193	5	54304681	62031799	5	60214476	60222722	8247	+	ENSBTAG00000016271	SNRPF	protein_coding
194	5	54304681	62031799	5	60222922	60248210	25289	-	ENSBTAG00000016274	CCDC38	protein_coding
195	5	54304681	62031799	5	60255971	60270687	14717	+	ENSBTAG00000016275	AMDHD1	protein_coding
196	5	54304681	62031799	5	60276265	60299590	23326	-	ENSBTAG00000016276	HAL	protein_coding
197	5	54304681	62031799	5	60305573	60336225	30653	-	ENSBTAG00000016415	LTA4H	protein_coding
198	5	54304681	62031799	5	60480235	60548556	68322	+	ENSBTAG00000001509	ELK3	protein_coding
199	5	54304681	62031799	5	60554135	60664570	110436	-	ENSBTAG00000001510	CDK17	protein_coding
200	5	54304681	62031799	5	60753106	60789924	36819	+	ENSBTAG00000002251	#N/A	protein_coding
201	5	54304681	62031799	5	60792488	60800112	7625	+	ENSBTAG00000052520	#N/A	protein_coding
202	5	54304681	62031799	5	60796779	61065110	268332	+	ENSBTAG00000015792	CFAP54	protein_coding
203	5	54304681	62031799	5	61105019	61157165	52147	+	ENSBTAG00000001894	NEDD1	protein_coding
204	5	54304681	62031799	5	61157595	61159007	1413	-	ENSBTAG00000051433	#N/A	protein_coding
205	5	54304681	62031799	5	61668359	61671232	2874	+	ENSBTAG00000051358	#N/A	lncRNA
206	5	54304681	62031799	5	61673859	61701945	28087	+	ENSBTAG00000053640	#N/A	lncRNA
207	5	54304681	62031799	5	61676666	61676726	61	+	ENSBTAG00000048583	#N/A	misc_RNA
208	5	54304681	62031799	5	61701393	61701462	70	+	ENSBTAG00000038463	bta-mir-1251	miRNA
209	5	54304681	62031799	5	61701922	61702062	141	+	ENSBTAG00000051682	#N/A	misc_RNA
210	5	54304681	62031799	5	61701966	61704268	2303	+	ENSBTAG00000048403	#N/A	lncRNA
211	5	54304681	62031799	5	61702644	61702752	109	+	ENSBTAG00000054783	#N/A	misc_RNA
212	5	54304681	62031799	5	61703338	61703443	106	+	ENSBTAG00000054365	#N/A	misc_RNA
213	5	54304681	62031799	5	61705209	61705337	129	+	ENSBTAG00000053880	#N/A	misc_RNA
214	5	54304681	62031799	5	61739428	61773253	33826	+	ENSBTAG00000054474	#N/A	lncRNA
215	5	54304681	62031799	5	61741537	61741738	202	+	ENSBTAG00000054026	#N/A	misc_RNA
216	5	54304681	62031799	5	61743540	61743806	267	+	ENSBTAG00000054823	#N/A	misc_RNA
217	5	54304681	62031799	5	61772724	61772889	166	+	ENSBTAG00000052500	#N/A	misc_RNA
218	5	54304681	62031799	5	61773018	61773210	193	+	ENSBTAG00000053078	#N/A	misc_RNA
219	5	54304681	62031799	5	61775955	61776054	100	+	ENSBTAG00000029917	bta-mir-135a-2	miRNA
220	5	54304681	62031799	5	61776325	61776474	150	+	ENSBTAG00000052477	#N/A	misc_RNA
